# Supplementary material for: Recent advances in Zr and Hf-based MXenes and their hetero-structure as novel anode materials for Ca-ion batteries: theoretical insights from DFT approach
Source: Royal Society of Chemistry journal article supplement (doi:10.1039/d4na00140k), 2024-01-01
Supplement: d4na00140k1.pdf [file d4na00140k1.pdf]

## Supplementary Information

### Recent Advances in Zr and Hf-based MXenes and their Hetero-structure as Novel Anode Materials for Ca-ion batteries: A Theoretical Insight from DFT Approach

Tanvir Ahmed <sup>a</sup>, Afiya Akter Piya <sup>a</sup> and Siraj Ud Daula Shamim <sup>a\*</sup>

Department of Physics, Mawlana Bhashani Science and Technology University, Tangail, Bangladesh.

\*Corresponding Author: Siraj Ud Daula Shamim ([sdshamim@mbstu.ac.bd](mailto:sdshamim@mbstu.ac.bd))

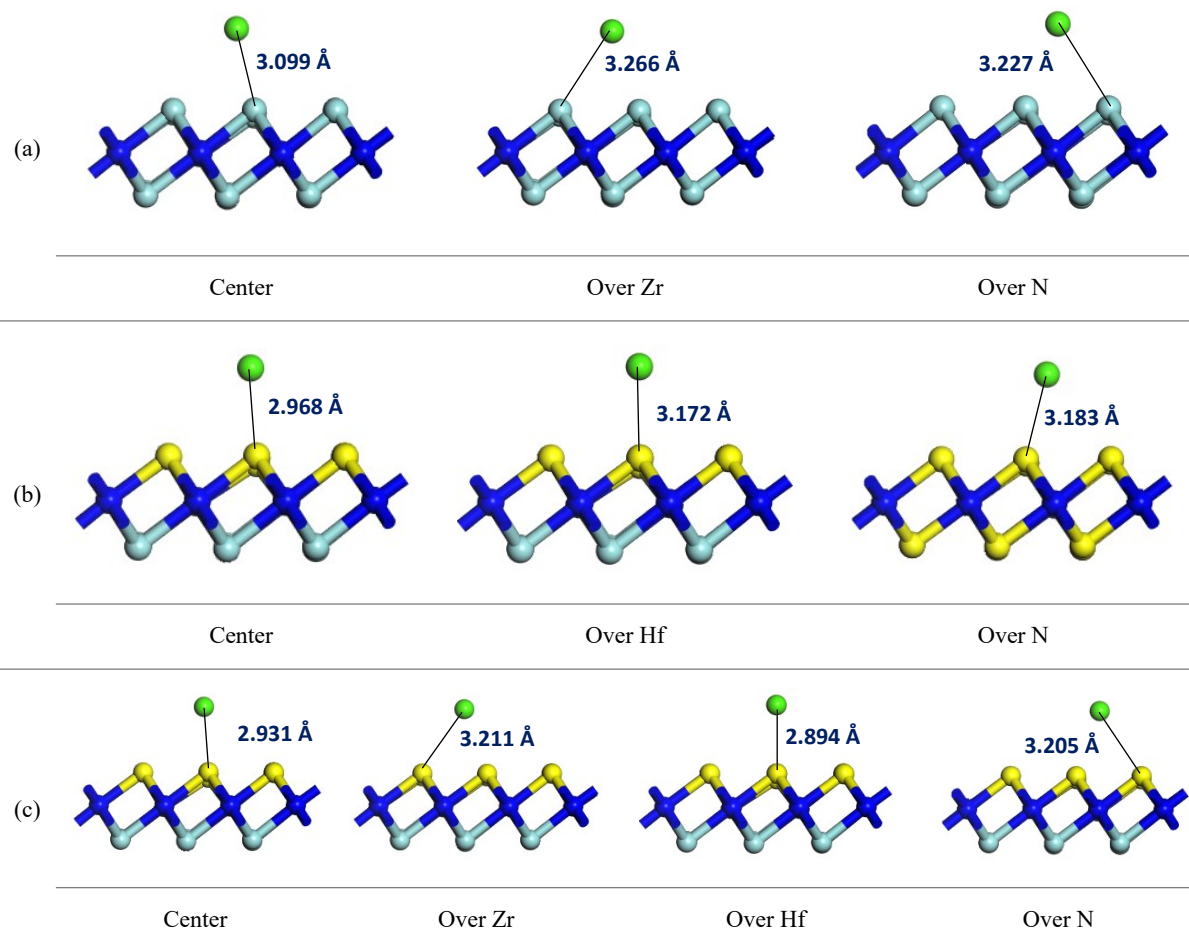

**Figure S1:** Minimum interaction distance between Ca adatom and MXenes.

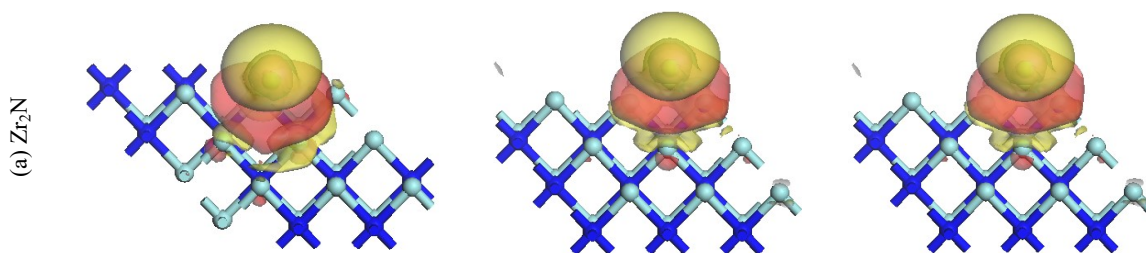

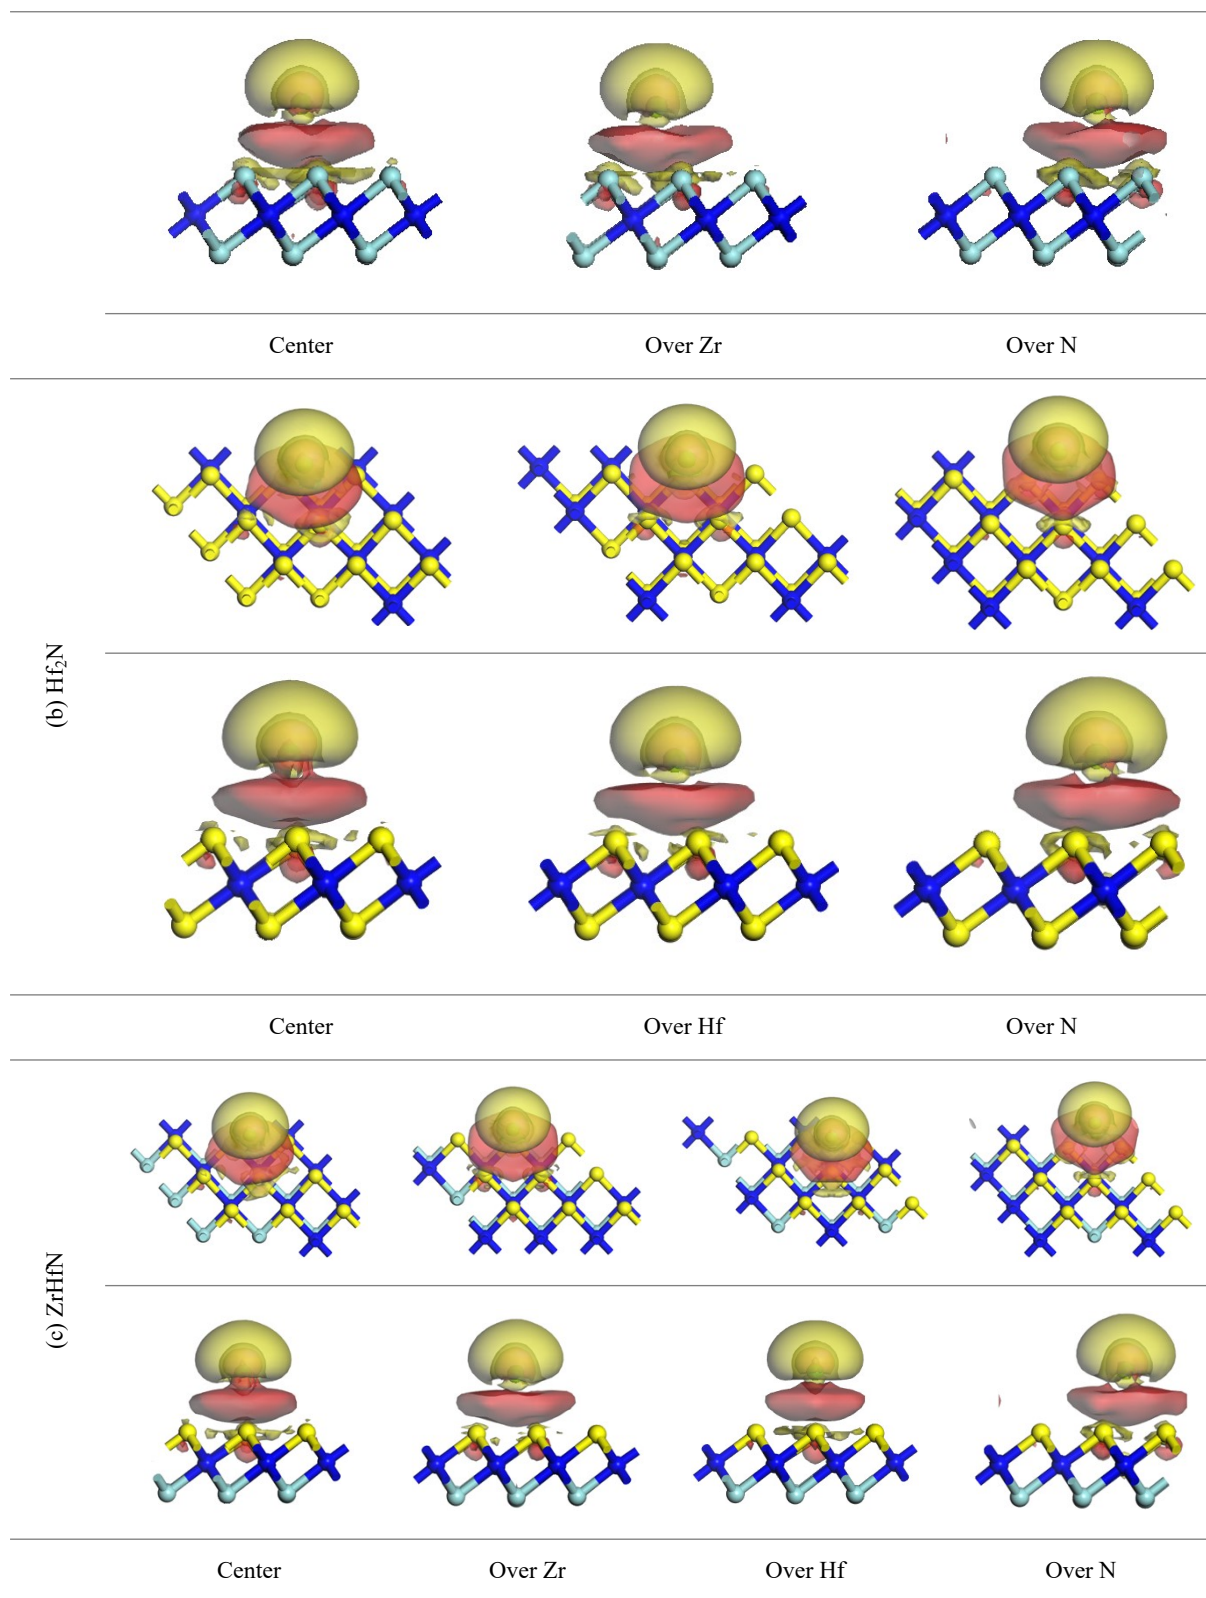

**Figure S2:** The CDD map of a single Ca loaded (a) Zr<sub>2</sub>N, (b) Hf<sub>2</sub>N and (c) ZrHfN. Where isosurface was set at  $0.01 e/\text{\AA}^{-3}$ .

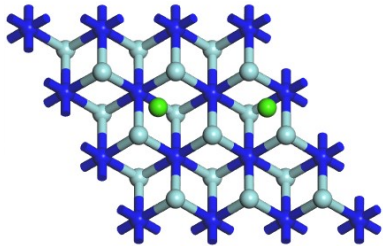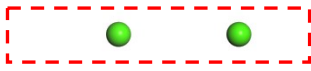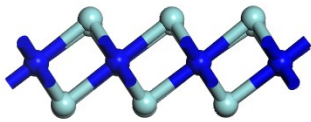

(a) 2 Ca

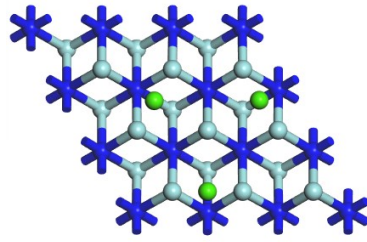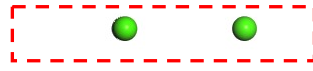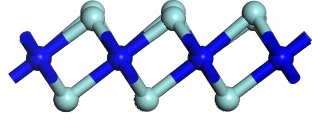

(b) 3 Ca

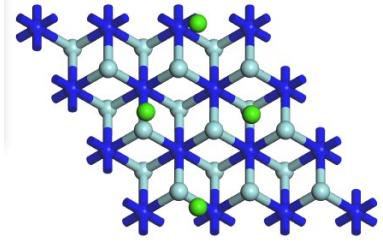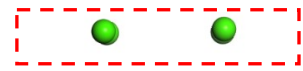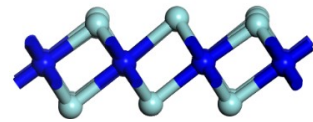

(c) 4 Ca

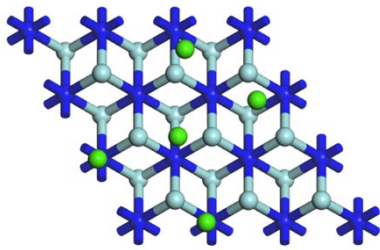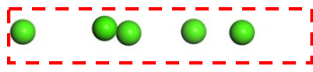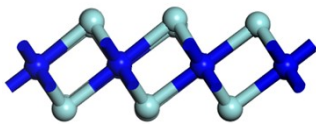

(d) 5 Ca

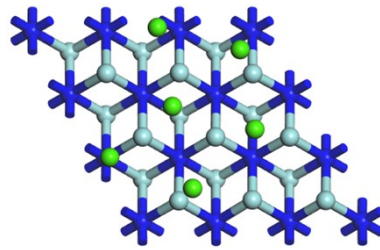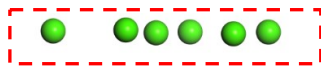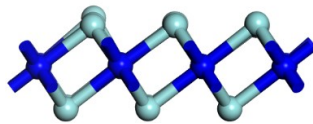

(e) 6 Ca

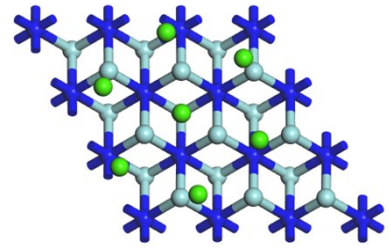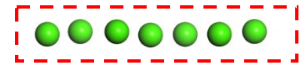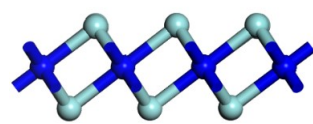

(f) 7 Ca

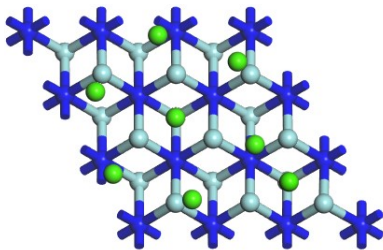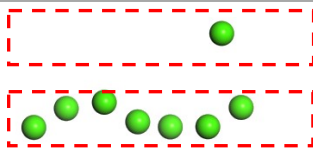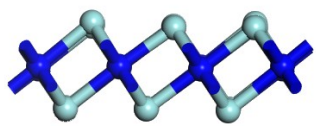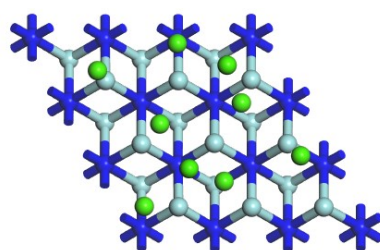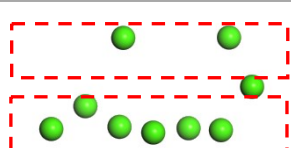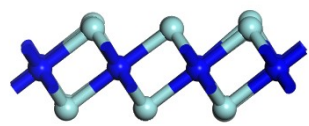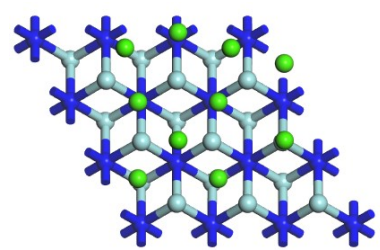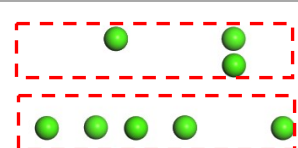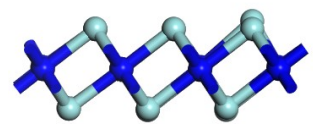



(g) 8 Ca

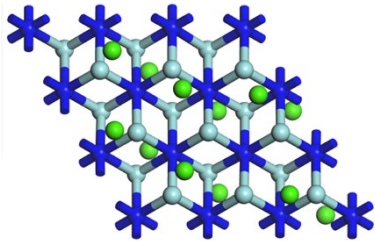

(h) 9 Ca

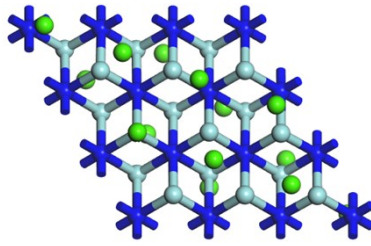

(i) 10 Ca

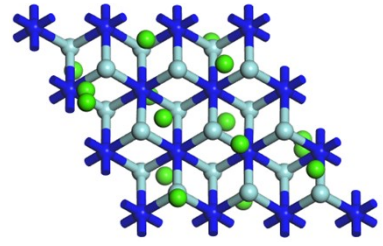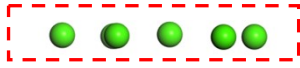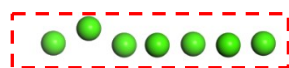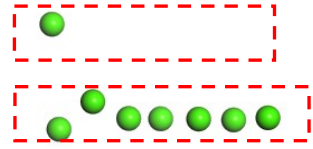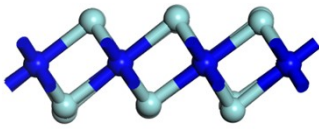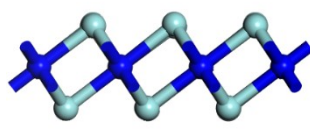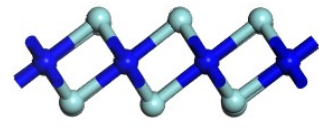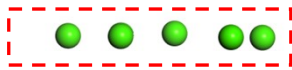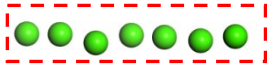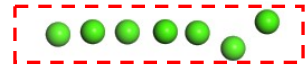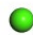

(j) 12 Ca

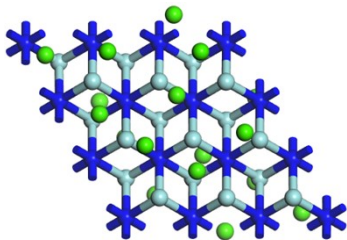

(k) 14 Ca

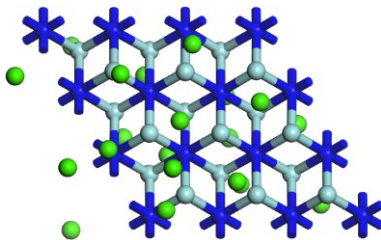

(l) 16 Ca

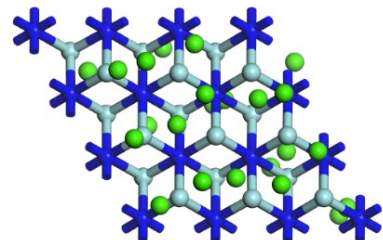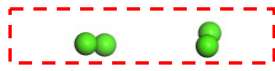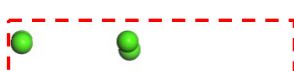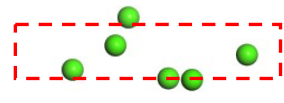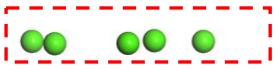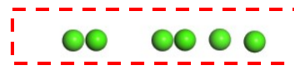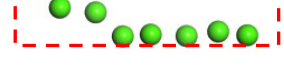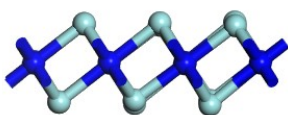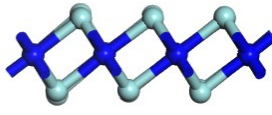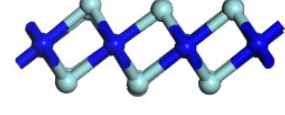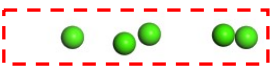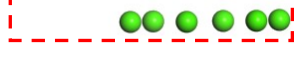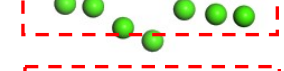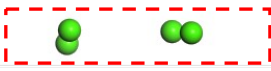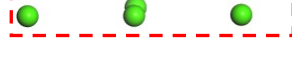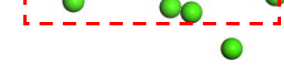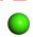

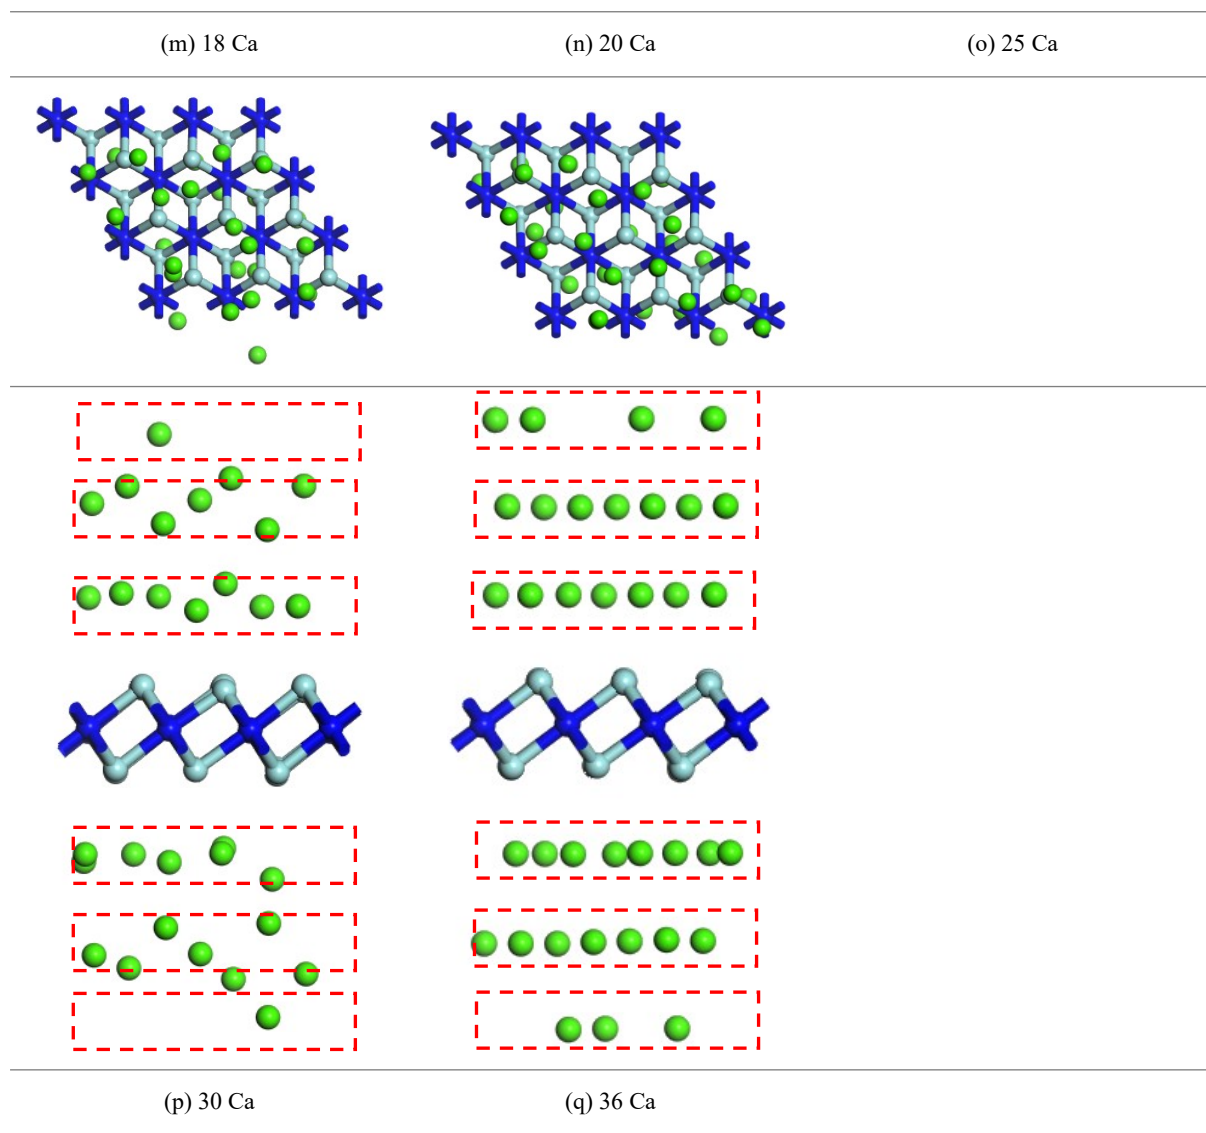

**Figure S3:** Top and side view of the Ca adsorption on  $Zr_2N$ .

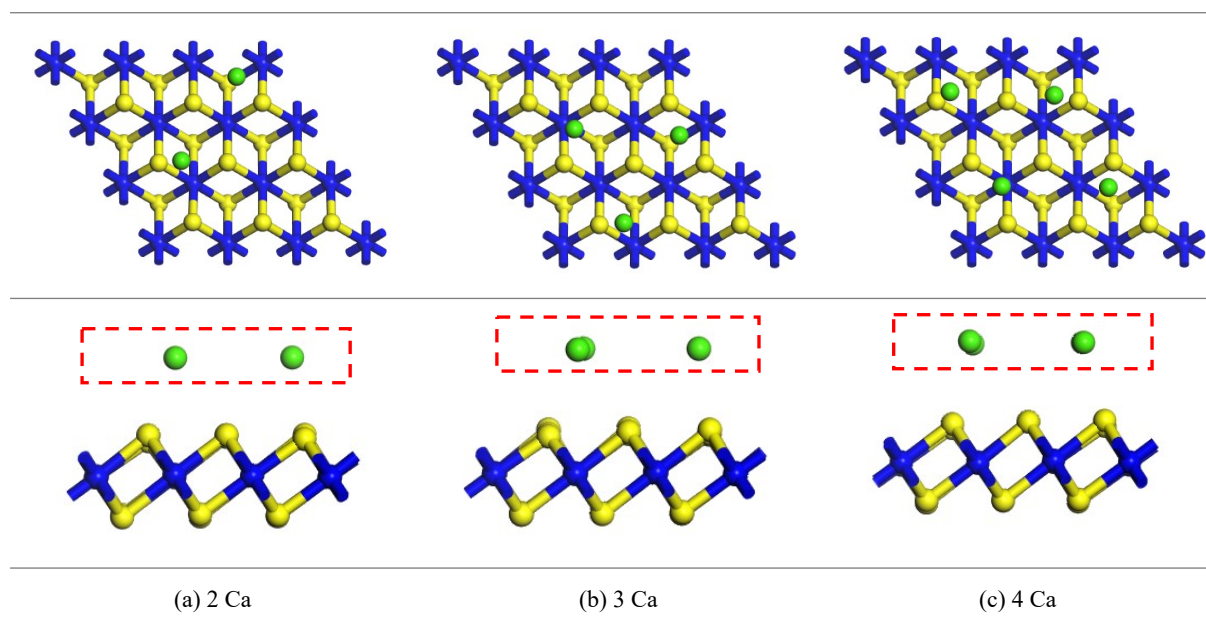

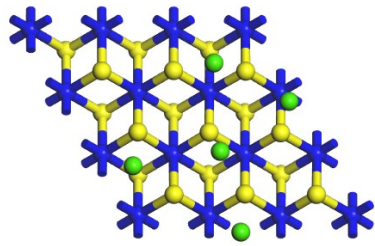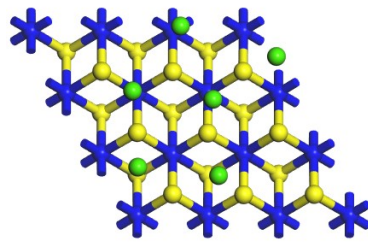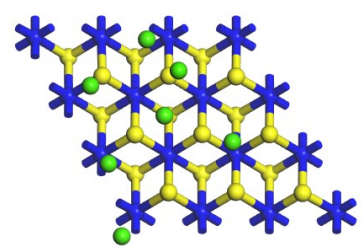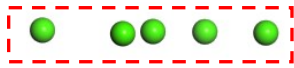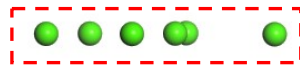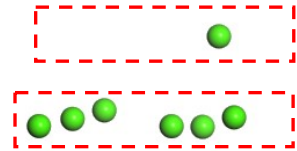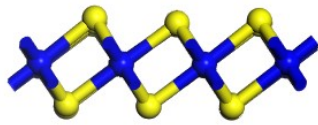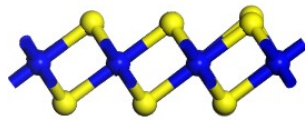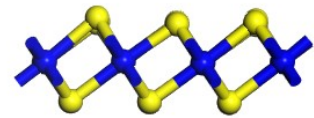

(d) 5 Ca

(e) 6 Ca

(f) 7 Ca

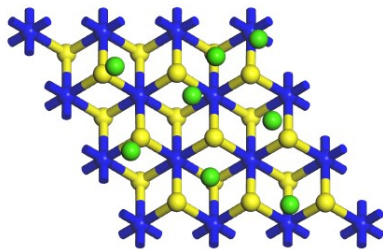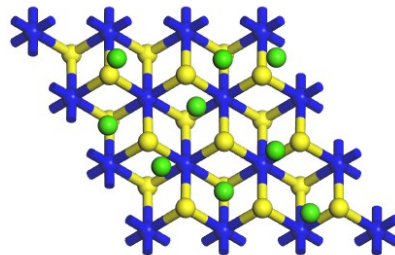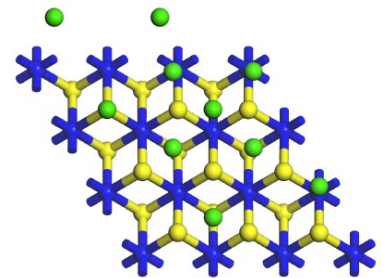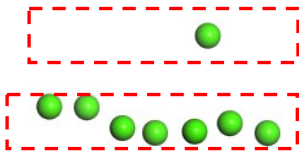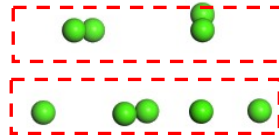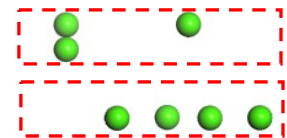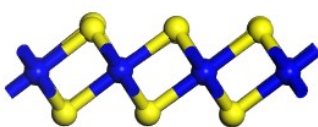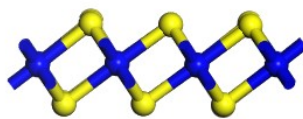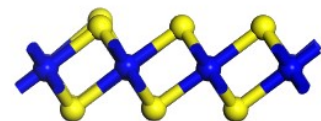

(g) 8 Ca

(h) 9 Ca

(i) 10 Ca

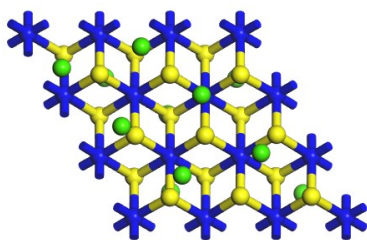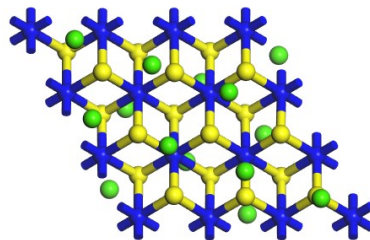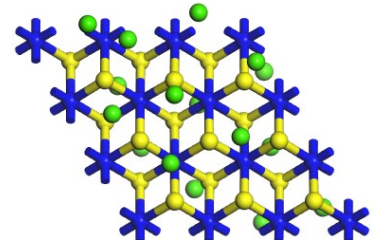



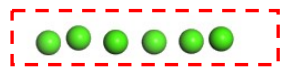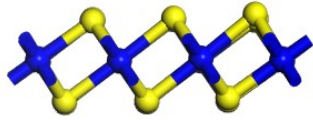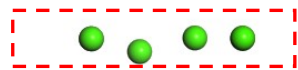

(j) 12 Ca

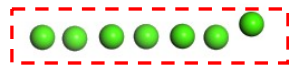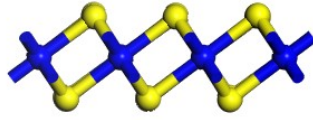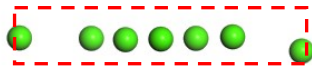

(k) 14 Ca

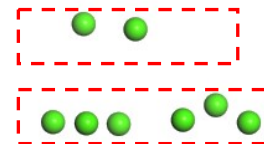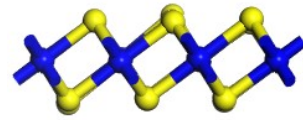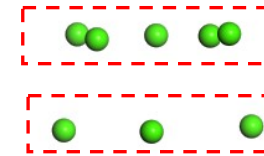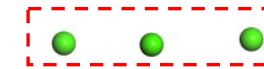

(l) 16 Ca

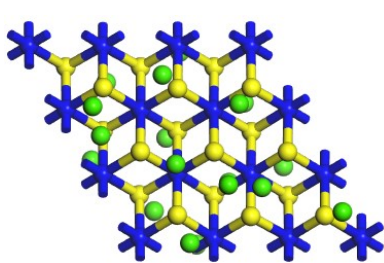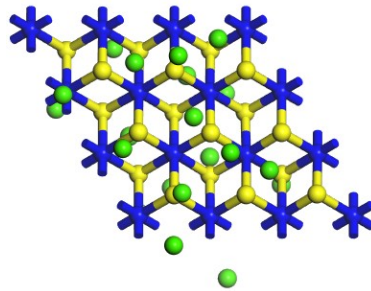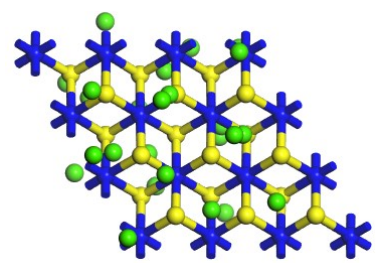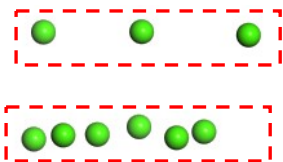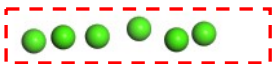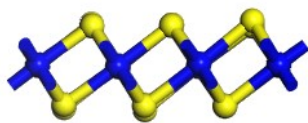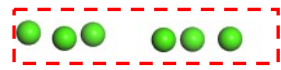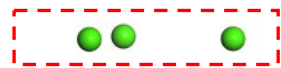

(m) 18 Ca

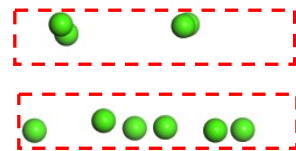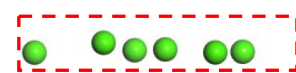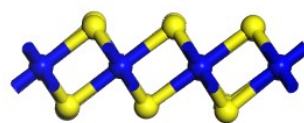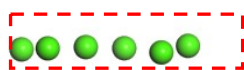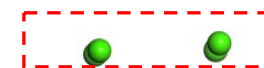

(n) 20 Ca

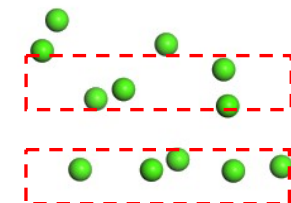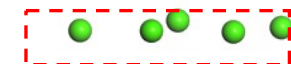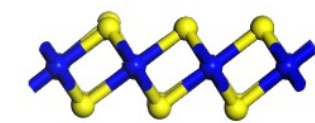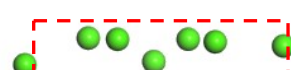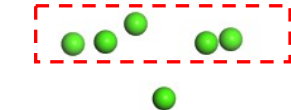

(o) 25 Ca

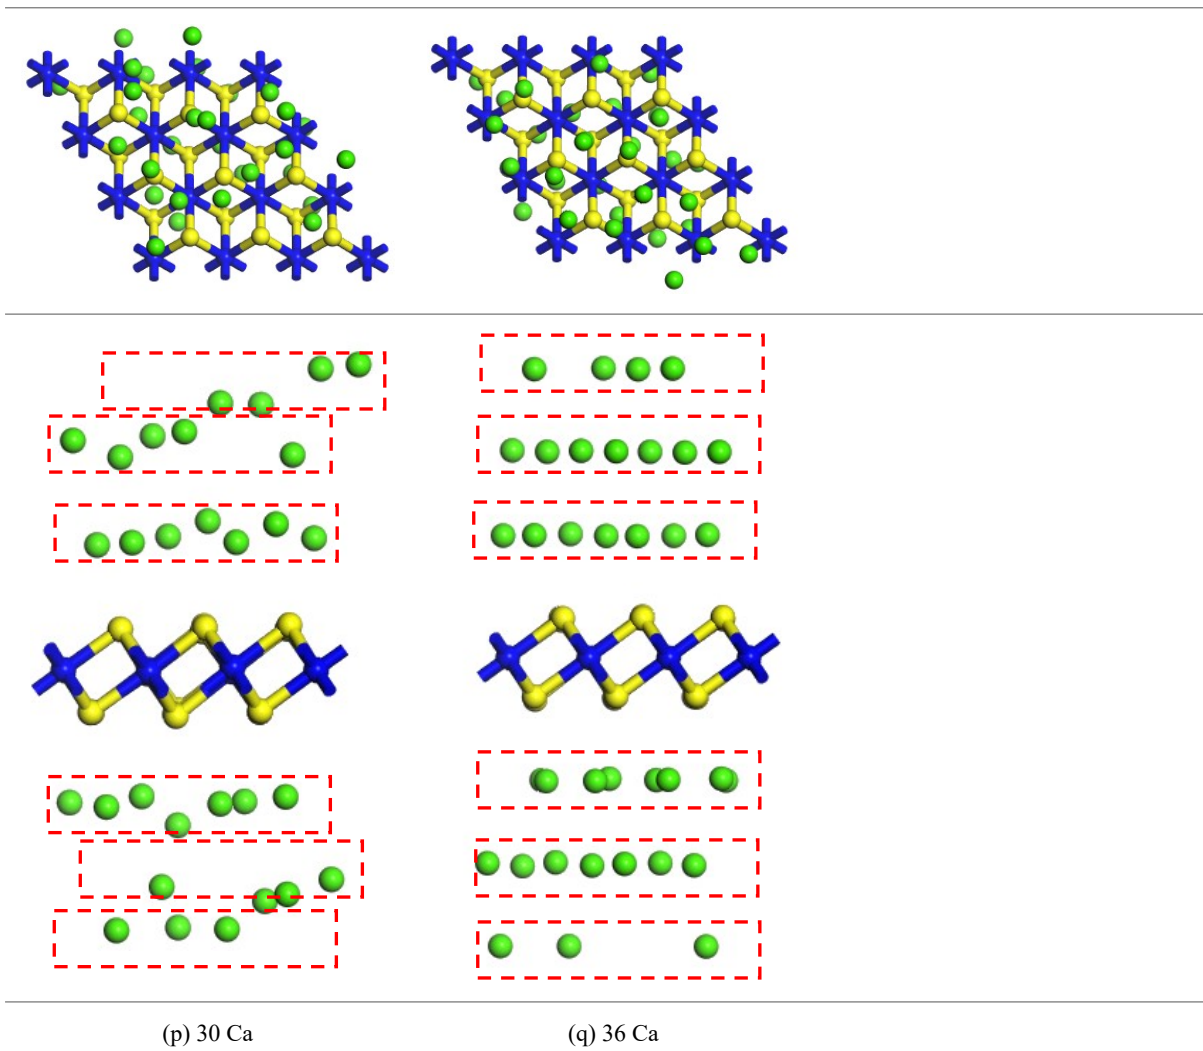

**Figure S4:** Top and side view of the Ca adsorption on Hf<sub>2</sub>N.

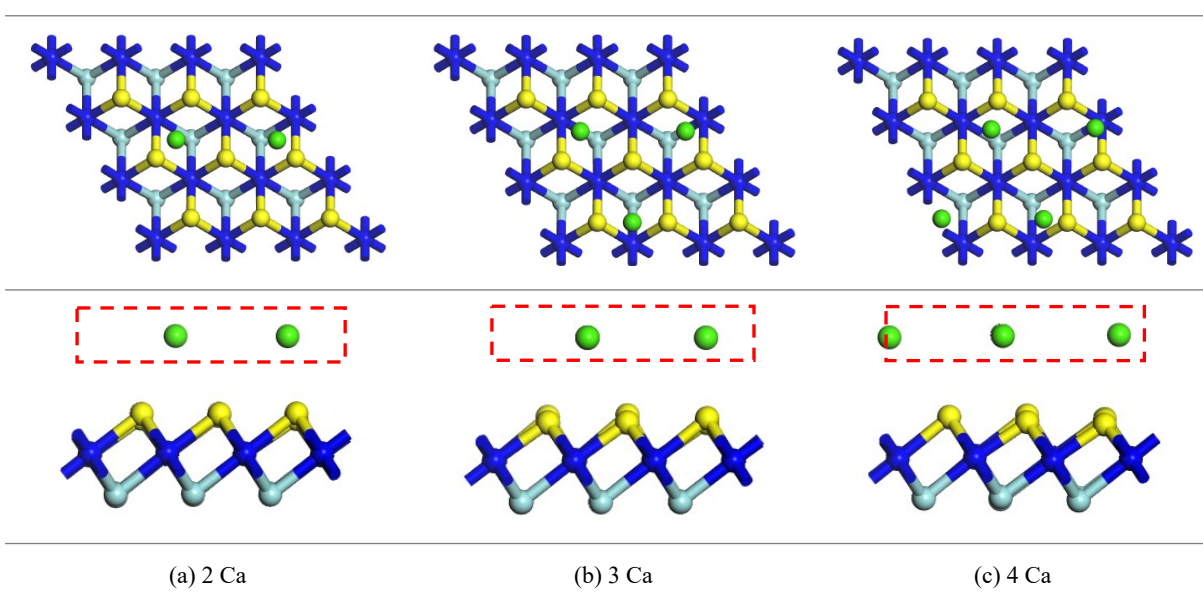



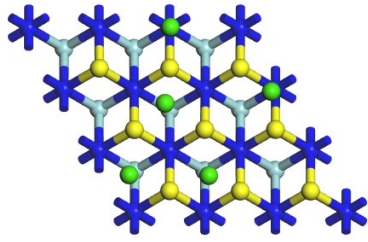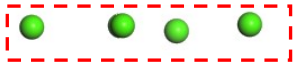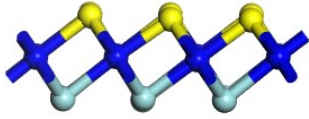

(d) 5 Ca

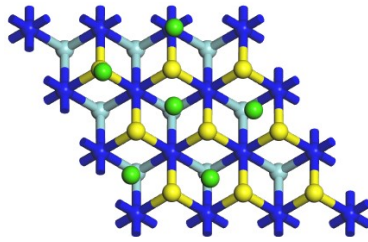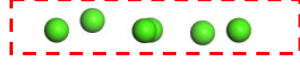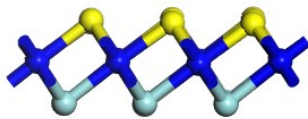

(e) 6 Ca

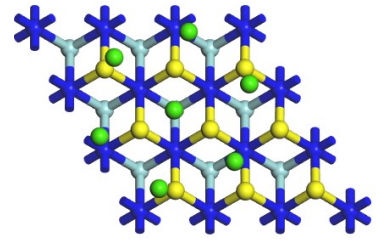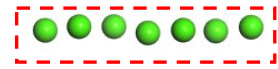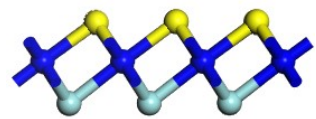

(f) 7 Ca

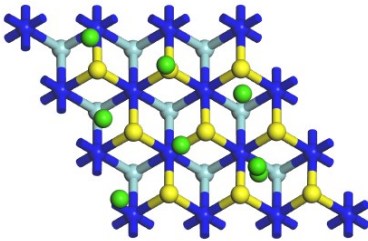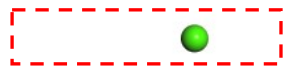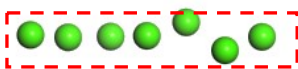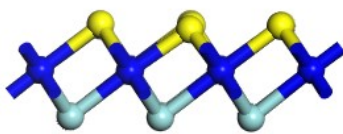

(g) 8 Ca

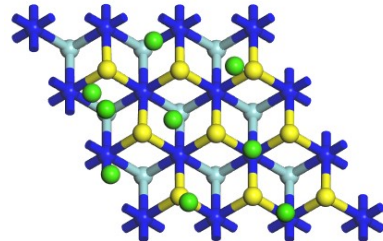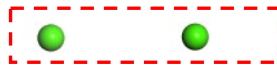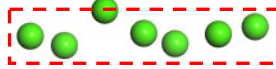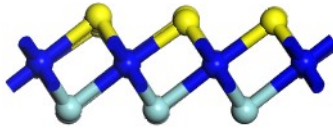

(h) 9 Ca

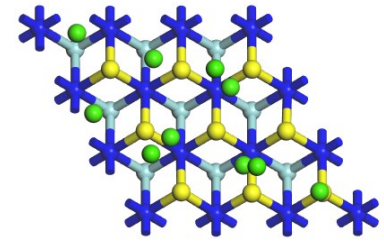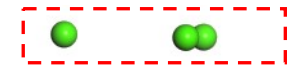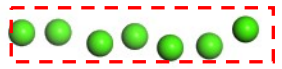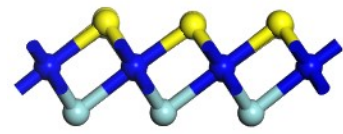

(i) 10 Ca

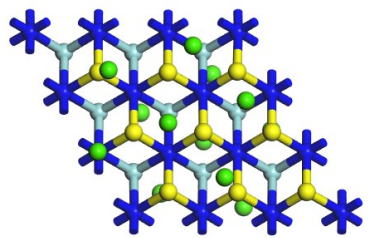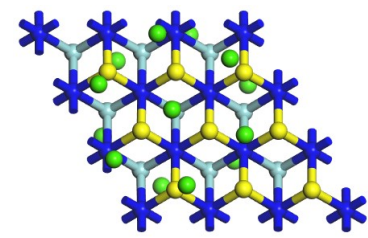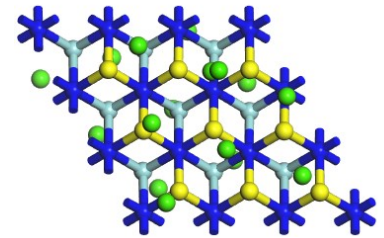

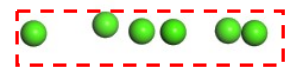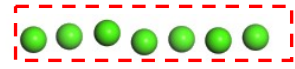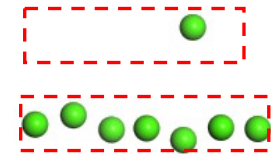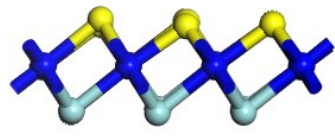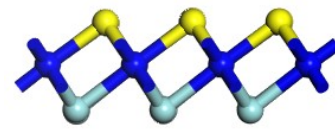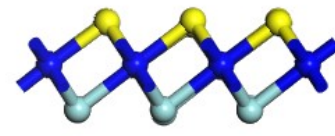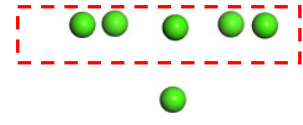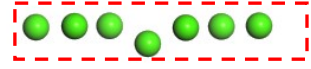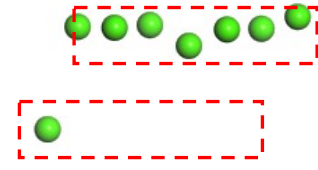

(j) 12 Ca

(k) 14 Ca

(l) 16 Ca

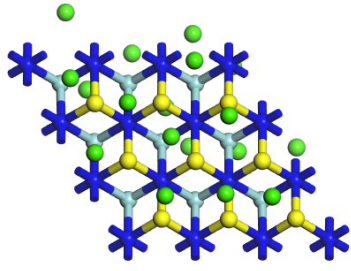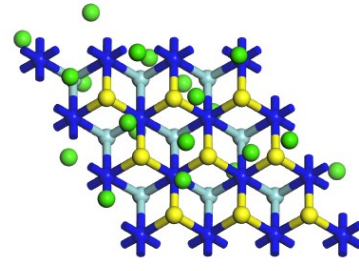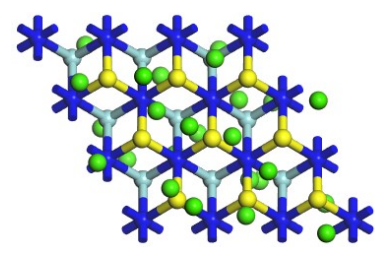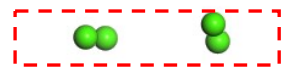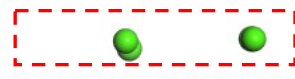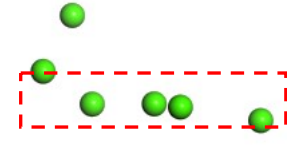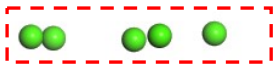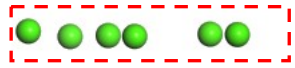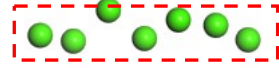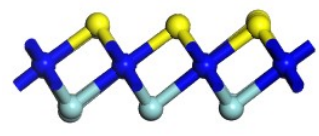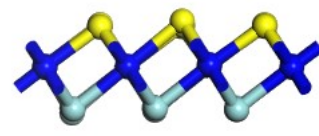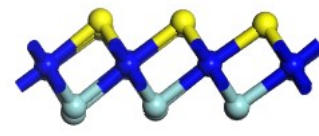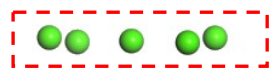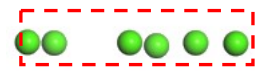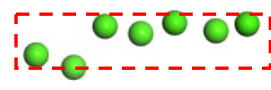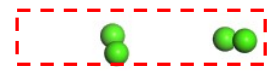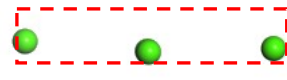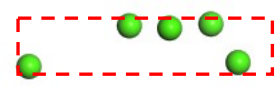

(m) 18 Ca

(n) 20 Ca

(o) 25 Ca

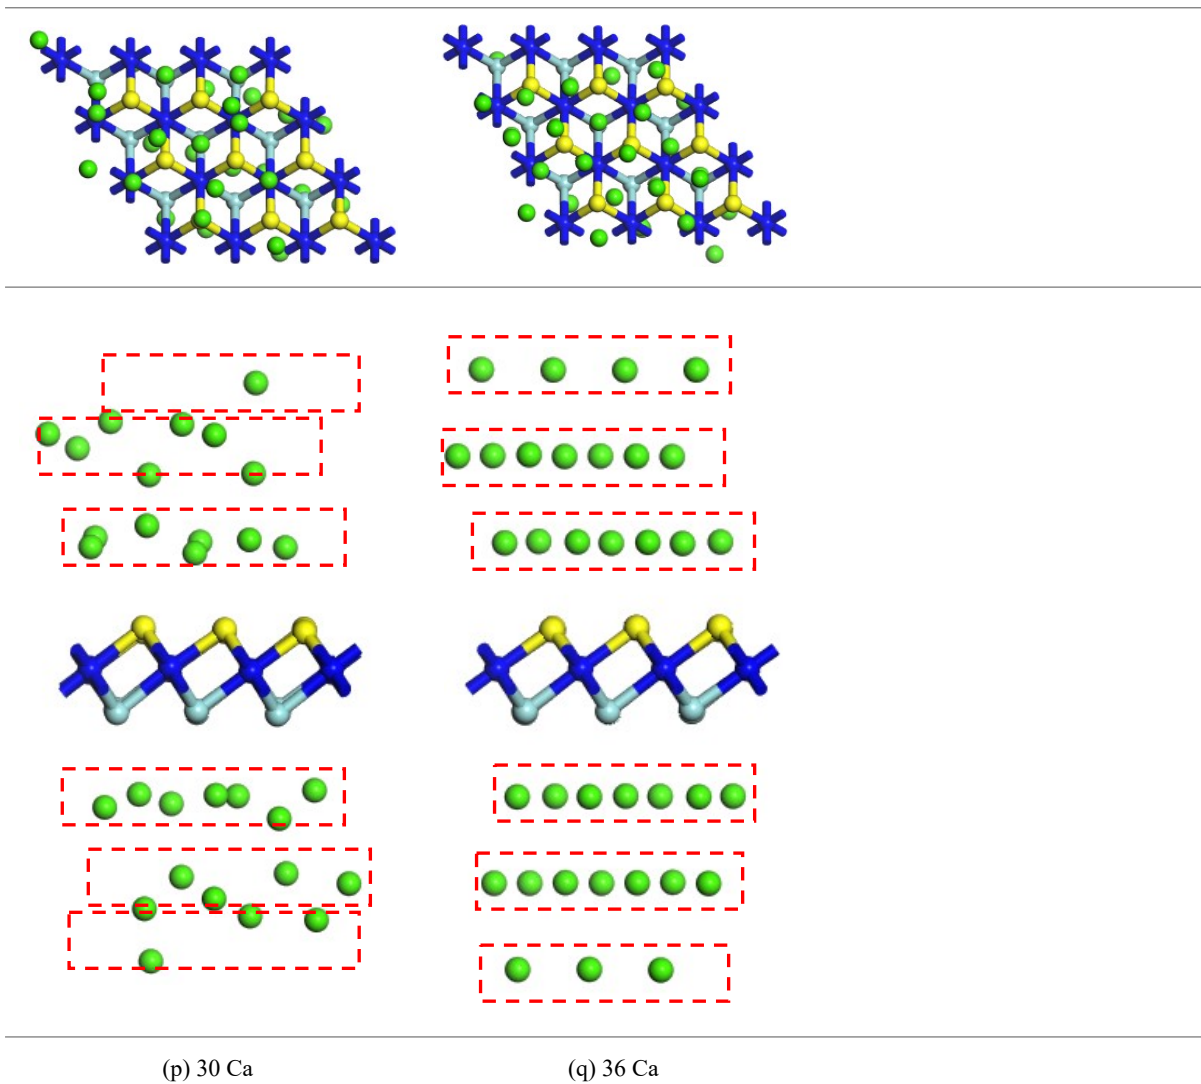

**Figure S5:** Top and side view of the Ca adsorption on ZrHfN.

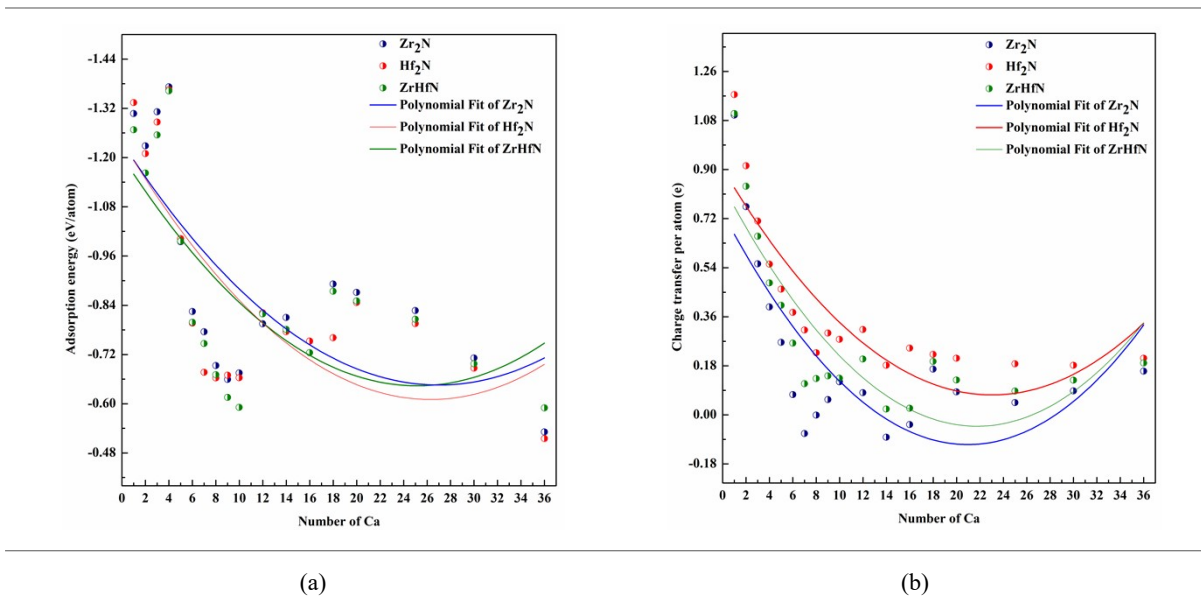

**Figure S6:** The graphical representation of (a) adsorption energy and (b) charge transfer with increasing the number of Ca on  $Zr_2N$ ,  $Hf_2N$  and  $ZrHfN$ .
